# Supplementary material
Source: PubMed Central journal article supplement (PMC7848914)
Supplement: AEM.02438-20-s0001.pdf [file AEM.02438-20-s0001.pdf]

## Supplementary Information

Structural and biochemical investigation of rutinoidase from *Aspergillus oryzae*

Koki Makabe,<sup>1,\*</sup> Ruka Hirota,<sup>2</sup> Yoshihito Shiono,<sup>2</sup> Yoshikazu Tanaka,<sup>3</sup> and Takuya Koseki<sup>2,\*</sup>

<sup>1</sup>Graduate School of Science and Engineering, Faculty of Engineering, Yamagata University, 4-3-16 Jonan, Yonezawa 992-8510, Japan

<sup>2</sup>Department of Biosciences, Faculty of Agriculture, Yamagata University, 1-23 Wakaba-machi, Tsuruoka 997-8555, Japan

<sup>3</sup>Graduate School of Life Sciences, Tohoku University, Sendai, 980-8555, Japan

\* Corresponding author:

K. Makabe: Yamagata University, Yonezawa 992-8510, Japan

E-mail address: makabe@yz.yamagata-u.ac.jp

T. Koseki: Yamagata University, Tsuruoka 997-8555, Japan

E-mail address: tkoseki@tds1.tr.yamagata-u.ac.jp

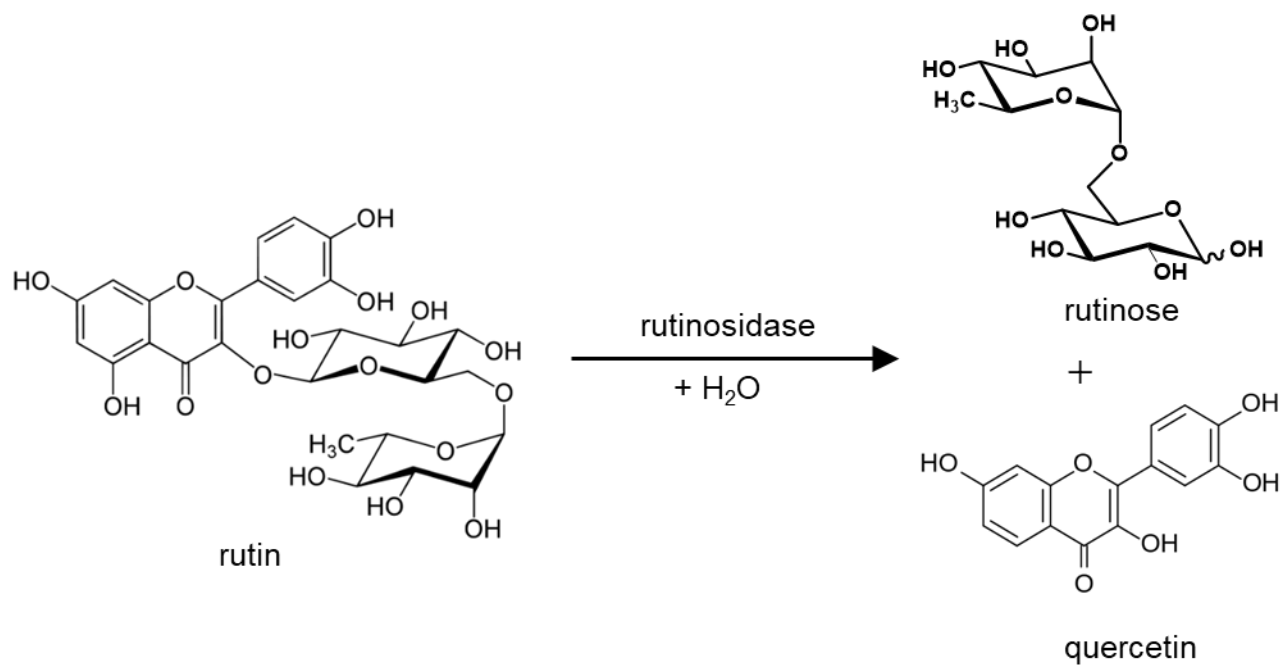

FIG S1 Reaction scheme of the rutin hydrolysis catalyzed by rutinoidase.

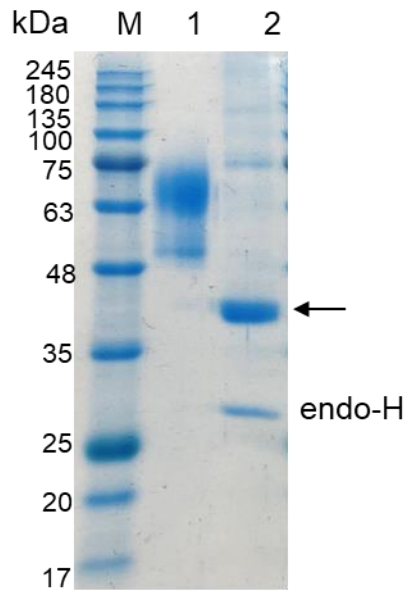

FIG S2 Sodium dodecyl sulfate-polyacrylamide gel electrophoresis (SDS-PAGE) analysis of purified *rAORutM*. Lane M, molecular mass markers; lane 1, no endo- $\beta$ -N-acetylglucosaminidase H (endo-H) treatment (13.0  $\mu$ g); lane 2, endo-H treated samples (13.0  $\mu$ g).
